1 Morphological changes in the mandible associated with the presence of exostoses: a study in two  
2 archaeological populations from southern France.

3 Estelle Casazza<sup>1\*</sup>, Benoit Ballester<sup>2</sup>, Camille Philip-Alliez<sup>3</sup>, Yann Ardagna<sup>4</sup>, Anne Raskin<sup>1</sup>

4 <sup>1</sup> Aix Marseille University, APHM, CNRS, EFS, ADES, Marseille, France.

5 <sup>2</sup> Aix Marseille University, APHM, INSERM, IRD, SESSTIM, ISSPAM, Marseille, France.

6 <sup>3</sup> Aix Marseille University, APHM, University Gustave Eiffel, LBA, Marseille, France.

7 <sup>4</sup> Aix Marseille University, CNRS, EFS, ADES, Marseille, France.

8

9 \* Corresponding author

10 E-mail: [estelle.casazza@ap-hm.fr](mailto:estelle.casazza@ap-hm.fr) (EC)

11

12 Author contributions

13 EC: Conceptualization, Investigation, Methodology, Writing

14 BB: Investigation and Formal Analysis

15 YA: Project Administration and Resources

16 CPA: Visualization

17 AR: Methodology, Supervision and Validation

18

## 19 **Abstract**

20 This study aimed to investigate morphological changes in the mandible of subjects in  
21 archaeological collections associated with the presence of bony exostoses at the mandibular angle, which  
22 are described in the literature as related to specific behaviours of the manducatory apparatus like  
23 parafunctional activities. The skeletal sample investigated comprised adult individuals from two  
24 archaeological series. Sixteen measurements of the mandible were selected to evaluate anatomic  
25 variation in the two populations. Mandibles from both series were pooled for statistical analysis into two  
26 groups according to the number of exostoses at the mandibular angles: group 1 (number of exostoses  
27  $\leq 1$ ) and group 2 (number of exostoses  $\geq 2$ ). Measurements could be made on eighty mandibles. A  
28 statistically significant difference was demonstrated between group 1 and group 2 for the following

**NOTE: This preprint reports new research that has not been certified by peer review and should not be used to guide clinical practice.**

29 parameters: distance between mandibular angles, bicondylar width, ramus height, left condyle length,  
30 right and left coronoid process height. For each of these parameters, values were higher in group 2 than  
31 in group 1. This study presents an original methodology for studying anatomical variations of the  
32 mandible in the context of parafunctional activity, highlighting certain mandibular modifications. The  
33 impact of parafunctional behaviours such as bruxism on the mandible therefore has many anatomical  
34 expressions. The considerable variability of results found in the literature shows that more studies are  
35 needed to reach a consensus on the impact of parafunctional activities on the mandible.

36 **Keywords:** mandible, exostoses, mandibular angle, archaeological population, oral parafunction,  
37 bruxism

## 38 Introduction

39 The mandible, the only mobile bone in the skull, consists of three parts: the body (corpus) and  
40 two rami, connected by two mandibular angles. Like all skeletal bones, the mandible is constantly  
41 remodelled under the effect of several factors, which may be systemic (e.g. hormones, growth factors)  
42 or local (e.g. mechanical stresses) resulting from the action of the muscles of the manducatory apparatus  
43 [1–3]. Several muscles insert on the mandible to support the functions of mastication, swallowing,  
44 phonation, and emotion management. These include the mandibular elevator and depressor muscles,  
45 and those responsible for mandibular propulsion [4], which insert at various mandibular levels and  
46 connect the mandible to the facial skeleton.

47 Bone remodelling induced by mechanical stress was described as early as 1892 by Wolff, who  
48 noted that “bone in a healthy person or animal adapts to the forces to which it is subjected”[5]. Bone  
49 can respond locally to the mechanical stresses to which it is subjected, via cellular adaptation  
50 mechanisms [6]. Several types of bone response have been described. If appropriate mechanical stresses  
51 are applied, bone mass may increase. However, if the mechanical stresses applied are too great, there  
52 may be a reduction in bone mass through increased resorption, with a risk of fatigue fracture. On the  
53 other hand, if the bone is not stressed, or is immobilised, it exhibits a high level of resorption with a  
54 concomitant reduction in bone formation [7].

55           Assessment of mandibular bone remodelling involves the evaluation of mandibular volume.  
56   Here, researchers have several options: the use of radiological imaging derived from medical activity,  
57   which requires the use of slices in all three spatial planes [8]; accessing bodies donated to science, which  
58   presents difficulties of access and implementation (e.g. preparation of parts); the study of archaeological  
59   series, which is dependent on the excavation conditions and state of preservation of the individuals  
60   recovered.

61           While the study of archaeological series deprives the researcher of access to certain data on the  
62   subjects investigated, it does allow measurements to be collected directly from the mandible, when its  
63   state of preservation permits. This has allowed the evaluation of mandibular markers, described in the  
64   literature as related to specific behaviours of the manducatory apparatus. This is the case for exostoses  
65   that may be present at the mandibular angles [9]. Their location corresponds to the lower insertion zones  
66   of the masseter muscle, the most powerful elevator muscle in the manducatory apparatus [10]. These  
67   exostoses develop when repeated muscular forces are applied through frequent contraction of the  
68   masseter muscles [11]. Several exostoses may be found at the same angle. The number of these exostoses  
69   reflects both the intensity of the forces exerted on the mandible in this area, and the high frequency with  
70   which these forces occur in the life of the individual, exceeding those ordinarily applied for manducatory  
71   functions alone, and potentially reflecting parafunctional behaviours established in the manducatory  
72   apparatus of the individuals observed [12].

73           This study aimed to investigate morphological changes in the mandible of subjects in  
74   archaeological collections associated with the presence of bony exostoses at the mandibular angle.

75

## 76   **Materials and Methods**

### 77   **Skeletal samples**

78           This study was conducted with ethical approval from the SRA DRAC-PACA, French Ministry  
79   of Culture. The skeletal sample investigated comprised adult individuals from two archaeological series,

80 Les petites Crottes (Bouches-du-Rhône, Marseille, Old cemetery of Crottes, 2016, 10 461), and L'îlot  
81 Saint Jacques (Bouches-du-Rhône, La Ciotat, Carré Saint Jacques, 2011). Both collections are held at  
82 the SRA DRAC PACA Osteotheque and were studied on site.

### 83 **Description of archaeological sites**

84 The Petites Crottes sample, dated from 1784 to 1905, was excavated from a parish cemetery in  
85 North Marseille, in southern France. Excavations took place in 2013 and 2014 [13]. The field study  
86 population consisted of 1,548 individuals; 532 subjects were studied in the laboratory [14]. Adult sex  
87 was evaluated in most cases by an assessment of the coxal bone using Bruzek's morphoscopic method  
88 [15] and probabilistic sex diagnosis or PSD [16]. Age at death of adult subjects was estimated by noting  
89 the bone maturity status of the clavicle and the coxal bone, degenerative pathologies, and dental status  
90 (attrition, ante-mortem tooth loss, etc.). Adult subjects were divided into three age classes: young adults  
91 (20-39 years), mature adults (40-59 years), and elderly adults (> 60 years).

92 The Ilot Saint-Jacques sample came from a parish cemetery, in use from 1581 to 1831, in the  
93 town of La Ciotat, in southern France. Excavations took place in 2009 [17]. The population studied in  
94 the field comprised 1,245 individuals; 400 subjects were studied in the laboratory. Biological parameters  
95 were investigated using techniques identical to those described for the first series.

### 96 **Sample selection**

97 The first phase of selection of individuals from the subjects preserved in the SRA DRAC PACA  
98 Osteotheque was based on the individual osteological conservation sheets taken from the excavation  
99 reports for the two archaeological sites, according to the following criteria:

#### 100 Subject inclusion criteria

- 101 - Adult individual,
- 102 - With or without a sex diagnosis,
- 103 - Presenting a completely intact mandible OR presenting a mandible with a single post-mortem
- 104 bone fracture allowing anatomical reassembly of the two fragments present OR an incomplete

105 mandible missing a single mandibular anatomical element such as a condyle, coronoid process,  
106 or mandibular angle (right or left).

107

108 Criteria for non-inclusion of subjects

109 - Immature subject,

110 - Presence of temporary teeth on an arch,

111 - Mandible absent,

112 - Mandible deterioration: in more than two pieces, several fragments missing,

113 - Edentulous mandible (ante-mortem closure of dental sockets).

114 In the second phase the collections were examined, and the subjects listed in the initial excavation report  
115 file as meeting the inclusion criteria but presenting significant deterioration of the mandible objectified  
116 during the examination were excluded.

## 117 **Methods**

### 118 **Measurements made on archaeological series**

119 Some of the measurements made were based on previously defined procedures for dry bone,  
120 except for condylar and coronoid process measurements [18,19]. Sixteen measurements of the mandible  
121 were selected to evaluate anatomic variation in the two populations:

122 - Chin height, right side

123 - Corpus height, right side

124 - Corpus width, right side

125 - Bigonial breadth

126 - Bicondylar breadth

127 - Minimum ramus width, right side

128 - Maximum ramus height, right side

129 - Corpus length, right side

130 - Mandibular angle, both side

131 - Maximum width of right and left condyles

132 - Maximum length of right and left condyles

133 - Presence and number of exostoses at the mandibular angles

134 - Height of right and left coronoid processes

135 Measurements and their definitions are indicated in Figs 1a, 1b, 1c and 1d.

136

137 **Fig 1a (SP 545, Les petites Crottes collection). Measurements in the frontal plane.**

138 (a) chin height. (b) corpus height. (c) corpus width. (d) distance between mandibular angles. (e)

139 bicondylar width.

140

141 **Fig 1b (SP 460, Ilot Saint Jacques collection). Measurements in the sagittal plane.**

142 (f) minimum ramus width. (g) maximum ramus height. (h) corpus length. (i) mandibular angle. (j) right

143 coronoid process height.

144 **Fig 1c (SP 545, Les petites Crottes collection). Measurements in the horizontal plane.**

145 (k) maximum right condyle length. (l) maximum right condyle width. (m) maximum left condyle length.

146 (n) maximum left condyle width.

147

148 **Fig 1d (SP 545, Les petites Crottes collection). Presence of exostosis at the mandibular angle.**

149 (o) exostosis at the mandibular angle

150

151 These measurements were performed by two calibrated operators. Measurements were recorded

152 using sliding callipers, with readings being taken to the nearest 0.01 mm, while a mandibulometer was

153 used to measure the mandibular angle. Not all measurements were recorded on every individual due to

154 the incomplete or fragmentary condition of the remains. Nevertheless, most measurements could be

155 recorded on all individuals. Measurements recorded on parts exhibiting taphonomic, traumatic, or

156 pathologic changes were only included if they did not affect the measurement. The missing data rate for

157 each parameter studied was recorded (ratio of the number of mandibles on which the parameter was  
158 measured to the total number of mandibles studied).

## 159 **Statistical methods**

160 Analyses were performed using R software (version 4.0.3), available at [https://www.r-](https://www.r-project.org)  
161 [project.org](https://www.r-project.org).

### 162 Evaluator calibration

163 To check evaluator reliability (intra-operator variability) and method reproducibility (inter-  
164 operator variability), a Bland–Altman agreement test was performed on quantitative data, and a  
165 weighted Cohen’s Kappa test was run on the presence of bony exostoses at the mandibular angle, as the  
166 test was carried out on two ordinal samples.

### 167 Sample analysis

168 Mandibles from both series were pooled for statistical analysis. These were divided into two  
169 groups according to the number of exostoses at the mandibular angle:

170 - Group 1: total number of exostoses at the two mandibular angles, 0 or 1.

171 - Group 2: total number of exostoses at the two mandibular angles, greater than or equal to 2.

172 The F-test for equality of two variances was used to verify normal distribution and the equality of  
173 variances between the two groups.

174 An analysis was carried out on the whole sample using Welch's t-test to study the correlations between  
175 the presence of exostoses at the mandibular angle and the dimensional variation of the 15 mandibular  
176 parameters investigated.

177

## 178 **Results**

### 179 **Sample composition**

180 Measurements could be made on only 50 of the 102 adult subjects in the Petites Crottes series,  
181 selected initially on the basis of the excavation report.

182 Measurements could be made on only 30 of the 43 adult subjects in the Ilôt St Jacques series  
183 selected initially on the basis of the excavation report.

184 Biological parameters and the number of exostoses found for the 80 subjects studied are shown  
185 in Fig 2.

186

187 **Fig 2. Distribution of individuals according to sex, age, and presence of exostoses at the**  
188 **mandibular angle.**

189

190 The sample comprised 29 males, 19 females, and 32 subjects of undetermined sex.

191 Of these, 42 had a total of 0 or 1 mandibular angle exostoses for both angles (group 1), and 38 had a  
192 total of 2 or more mandibular angle exostoses for both angles (group 2).

193

## 194 **Evaluator calibration**

195 There was a good agreement of all 1200 quantitative measurements made by the two operators  
196 (Bland–Altman tests), both in terms of repeatability for each operator (Figs 3 and 4) and inter-operator  
197 reproducibility (Fig 5).

198

199 **Fig 3. Repeatability assessment for operator 1 (Bland-Altman plot).**

200 **Fig 4. Repeatability assessment for operator 2 (Bland-Altman plot).**

201 **Fig 5. Good agreement of 15 measurements for each of the 80 mandibles, between the two**  
202 **evaluators (Bland-Altman test).**



203 In addition, agreement was obtained for the count of mandibular angle exostoses with excellent  
 204 reproducibility (Weighted Cohen’s Kappa coefficient = 0.94 for the right side and 0.96 for the left side).

## 205 Sample analysis

206 The characteristics of the 15 parameters recorded for the 80 mandibles in the sample are shown  
 207 in Table 1.

208 **Table 1. Descriptive statistics for the overall sample.**

| ROI                                 | Minimum<br>(mm) | Maximum<br>(mm) | Mean<br>(mm) | Standard<br>deviation<br>(mm) | Missing<br>(number<br>percents) | data<br>and |
|-------------------------------------|-----------------|-----------------|--------------|-------------------------------|---------------------------------|-------------|
| Chin Height                         | 16,80           | 39,53           | 29,05        | 4,25                          | 1 (1,25%)                       |             |
| Corpus Height                       | 14,11           | 38,88           | 28,61        | 4,49                          | 0 (0%)                          |             |
| Corpus Width                        | 7,79            | 15,70           | 11,30        | 1,64                          | 0 (0%)                          |             |
| Bigonial Breadth                    | 81,38           | 121,14          | 99,21        | 8,07                          | 11 (13,75%)                     |             |
| Bicondylar Breadth                  | 102,70          | 130,90          | 118,80       | 6,29                          | 30 (37,5%)                      |             |
| Minimum Ramus<br>Width              | 23,71           | 41,66           | 31,72        | 3,75                          | 0 (0%)                          |             |
| Maximum Ramus<br>Height             | 50,75           | 74,25           | 62,18        | 5,33                          | 1 (1,25%)                       |             |
| Corpus Length                       | 63,00           | 85,00           | 73,32        | 4,85                          | 0 (0%)                          |             |
| Mandibular Angle                    | 17,00           | 53,50           | 33,55        | 7,18                          | 0 (0%)                          |             |
| Maximum width of<br>Right Condyle   | 5,17            | 13,46           | 8,67         | 1,34                          | 15 (18,75%)                     |             |
| Maximum Length of<br>Right Condyle  | 15,36           | 24,35           | 20,54        | 2,10                          | 20 (25%)                        |             |
| Maximum Width of<br>Left Condyle    | 5,84            | 12,05           | 8,68         | 1,21                          | 14 (17,5%)                      |             |
| Maximum Length of<br>Left Condyle   | 16,60           | 23,73           | 20,34        | 1,76                          | 16 (20%)                        |             |
| Height of Right<br>Coronoid Process | 9,06            | 26,53           | 17,73        | 3,53                          | 18 (22,5%)                      |             |
| Height of Left<br>Coronoid Process  | 9,03            | 26,28           | 17,37        | 3,57                          | 14 (17,5%)                      |             |

209 ROI: Region Of Interest

210

211 The conditions for the application of Welch's t-test were checked for each group using an F-test  
 212 for equality of variance between the two groups, and the normality of the distribution was checked using  
 213 the Q-Q plot graphical method.

214 The statistical analysis of the overall sample using Welch's t-test, to investigate correlations  
 215 between the presence of bony exostoses at the mandibular angle and significant dimensional variation  
 216 in the 15 mandibular parameters investigated, is presented in Table 2.

217

218 **Table 2. Statistical analysis of the mandibular measurements of the whole sample according to**  
 219 **number of exostoses.**

| ROI                              | Group 1 mean<br>±SD (mm) | Group 2 mean<br>±SD (mm) | Welch Two Sample<br><i>p-value</i> t-test |
|----------------------------------|--------------------------|--------------------------|-------------------------------------------|
| Chin Height                      | 28.45±4.01               | 29.74±4.46               | 0,07                                      |
| Corpus Height                    | 28.66±4.25               | 28.55±4.79               | 0,40                                      |
| Corpus Width                     | 11.33±1.76               | 11.27±1.51               | 0,87                                      |
| Bigonial Breadth                 | 94.88±7.40               | 103.17±6.53              | 0,0000003139**                            |
| Bicondylar Breadth               | 116.60±6.19              | 120.70±5.84              | 0,04471*                                  |
| Minimum Ramus Width              | 31.71±4.16               | 31.73±3.29               | 0,50                                      |
| Maximum Ramus Height             | 60.99±5.79               | 63.52±4.44               | 0,0347*                                   |
| Corpus Length                    | 72.68±5.51               | 74.02±3.94               | 0,21                                      |
| Mandibular Angle                 | 32.87±6.85               | 34.31±7.55               | 0,62                                      |
| Maximum width of Right Condyle   | 8.49±1.48                | 8.86±1.17                | 0,34                                      |
| Maximum Length of Right Condyle  | 20.21±2.02               | 20.89±2.16               | 0,42                                      |
| Maximum Width of Left Condyle    | 8.53±1.20                | 8.83±1.21                | 0,21                                      |
| Maximum Length of Left Condyle   | 19.65±1.68               | 21.03±1.58               | 0,04345*                                  |
| Height of Right Coronoid Process | 16.55±3.76               | 19.00±2.82               | 0,00528**                                 |
| Height of Left Coronoid Process  | 16.44±3.79               | 18.41±3.03               | 0,007831**                                |

220 ROI: Region Of Interest. SD: Standard Deviation. p: significance level; \*significance level,  $p < 0.05$ ;

221 \*\*significance level,  $p < 0.001$

222

223 A statistically significant difference was demonstrated between group 1 (number of exostoses  
 224  $\leq 1$ ) and group 2 (number of exostoses  $\geq 2$ ) for the following parameters: distance between mandibular  
 225 angles, bicondylar width, ramus height, left condyle length, right and left coronoid process height. For  
 226 each of these parameters, values were higher in group 2 than in group 1.

## 227 **Discussion**

228           This study aimed to assess the presence of morphological changes in the mandible associated  
229 with the presence of bony exostoses at the mandibular angles. It was carried out on subjects recovered  
230 by archaeological excavation from two cemeteries located in the same geographical area (the city of  
231 Marseille and surrounding area, in southern France), in two series situated in the modern and  
232 contemporary historical periods.

233           The selection of these series was motivated by the desire to carry out a diachronic study on  
234 archaeological series presenting comparable geographical and environmental conditions, to limit the  
235 impact of extrinsic factors likely to have affected the state of health of the subjects buried in these  
236 cemeteries.

237           The archaeological series approach in itself denies researchers access to information relating to  
238 the behaviours adopted by subjects during their lifetime. However, this approach allows researchers to  
239 apprehend and measure distances directly, and even to evaluate volumes, freeing them from the potential  
240 bias in reconstructing cross-sections and volumes that is inherent in radiological techniques. The latter  
241 are particularly useful for assessing internal bone parameters such as bone density, as they avoid the  
242 need to destroy tissue to collect data; these two approaches therefore appear to be complementary for  
243 study of the mandible. Data collection was closely impacted by the state of preservation of subjects and  
244 considerable variability was noted both in the number of bone pieces found during excavation and in  
245 their state of preservation in situ and then in the laboratory. Thus, while archaeological series provide  
246 access to collections of bone remains, the authors had to work with missing data, all of which represent  
247 a source of potential bias, as not all mandibles present an optimal level of preservation. Furthermore, in  
248 order not to introduce any additional bias, teeth, which are often used in the archaeological study of  
249 mandibles, were excluded from data collection, as mandibles were often found without all teeth in situ:  
250 the collection of parameters such as wear or carious lesions appeared too random to be exploitable for  
251 statistical purposes.

252           The 80 mandibles were divided into two groups according to the number of mandibular  
253 exostoses counted at both mandibular angles. It was decided that a subject with a unilateral exostosis  
254 associated with the absence of an exostosis at the contralateral angle would be grouped with individuals  
255 with no exostosis at either angle, as this isolated exostosis alone could not reflect overactivity of the  
256 masticatory muscles. Thus, the presence of at least two exostoses was chosen as more likely to  
257 distinguish a parafunctional increase in mandibular activity from ordinary manducatory activity.  
258 [20,21].

259           The mandibular characteristics associated with the presence of exostoses at the mandibular angle  
260 have been studied in the literature. Indeed, several studies [9,20,22] associate the presence of mandibular  
261 exostoses with the expression of a parafunctional activity called bruxism, which reflects intense activity  
262 of the muscles of the manducatory apparatus. Other articles focus on the development of mandibular  
263 tori, which are oral exostoses located on the medial aspect of the mandibular arch. Research has also  
264 shown that signs of parafunctional activity are associated with the presence of mandibular tori [23].

265           The impact on the mandible of these parafunctional muscular activities associated with bruxism  
266 has been the subject of various published studies, based mainly on two-dimensional medical imaging,  
267 and involving the analysis of panoramic radiographs. Morphological changes in the mandible have been  
268 described, which sometimes contradict the data collected in this study. As a reminder, the study of  
269 archaeological collections has highlighted several morphological changes in the mandible, relating to  
270 parameters such as the distance between the mandibular angles, bicondylar width, ramus height, left  
271 condyle length, and right and left coronoid process height. The values of all these parameters were  
272 increased in subjects with multiple exostoses at the mandibular angles. These changes affected several  
273 anatomical regions of the mandible.

274           Various results have been presented for the condylar region of the mandible: the present study  
275 showed an increase in the length of the left mandibular condyle; one study [24] found no significant  
276 difference; several others [25–27] showed a reduction in condylar dimensions. This result should be  
277 treated with caution, as it was demonstrated for the left condyle only. Measurements of right condyle  
278 length, as well as maximum condyle widths on both sides, showed no statistically significant difference

279 between the two groups. Furthermore, many factors have been described in the literature as inducing  
280 variations in mandibular condyle shape, such as age, gender, facial typology, and intermaxillary dental  
281 relationships [28,29]. This ability to remodel the shape of the condyle reflects its functional adaptation  
282 throughout an individual's life, and the resulting modifications are often described as asymmetrical.

283 A bilateral increase in dimensions was found in the coronoid process region in this study. This  
284 is corroborated by the study of Cezairli *and al.* [30]; Padmaja Satheeswarakumar *et al.* [25] observed  
285 coronoid process measurements in bruxers that were significantly smaller on the right but larger on the  
286 left. A possible explanation for this size increase could relate to the insertion of the temporalis muscle  
287 and the deep fascicle of the masseter muscle on the lateral aspect of the coronoid processes: sustained  
288 muscular activity could explain the higher level of bone development found in patients with multiple  
289 exostoses.

290 Finally, this study reported an increased distance between the mandibular angles and between  
291 the lateral poles of the condyles in subjects with multiple exostoses compared to the other group.  
292 Although these measurements were not collected in the medical imaging studies, it is possible to advance  
293 an explanatory hypothesis based on knowledge of mandibular biomechanics. Indeed, Van Eijden [31]  
294 reported that during contraction of the elevator muscles, the mandible undergoes lateral flexion in the  
295 transverse direction, resulting in lateral torsion of the lower mandibular border. It thus seems possible  
296 to suggest that repetition of these muscle contractions over time has resulted in a widening of the  
297 intercondylar distance, and consequently an increased intercondylar distance due to the anatomical  
298 configuration of the mandible.

## 299 **Conclusion**

300 This study presents an original methodology for studying anatomical variations of the mandible  
301 in the context of parafunctional activity, highlighting certain mandibular modifications. The presence of  
302 bilateral mandibular exostoses was correlated with higher values for the distance between mandibular  
303 angles, bicondylar width, ramus height, left condylar length, and right and left coronoid process height.

304           The variations observed corroborated certain results present in the international literature. In  
305 addition, we did not investigate certain characteristics, such as bone density, by observation of trabecular  
306 bone, as study of the collections required the use of non-invasive methods. The use of imaging  
307 examinations could represent a potentially valuable research approach, whether applied to  
308 archaeological series or patient cohorts. Mandibular bone density has been analysed on panoramic X-  
309 rays, and the use of three-dimensional imaging, such as CBCT, which avoids the reconstruction bias and  
310 distortions of two-dimensional examinations, would appear to be a sensible option for future research,  
311 both in terms of bone density and morphological variations.

312           The impact of parafunctional behaviours such as bruxism on the mandible therefore has many  
313 anatomical expressions. The considerable variability of results found in the literature shows that more  
314 studies are needed to reach a consensus on the impact of parafunctional activities on the mandible.

315

## 316 **References**

- 317 [1] Duncan RL, Turner CH. Mechanotransduction and the functional response of bone to mechanical  
318 strain. *Calcif Tissue Int* 1995;57:344–58. <https://doi.org/10.1007/BF00302070>.
- 319 [2] Bassett JHD, Williams GR. Role of Thyroid Hormones in Skeletal Development and Bone  
320 Maintenance. *Endocr Rev* 2016;37:135–87. <https://doi.org/10.1210/er.2015-1106>.
- 321 [3] Buvinic S, Balanta-Melo J, Kupczik K, Vásquez W, Beato C, Toro-Ibacache V. Muscle-Bone  
322 Crosstalk in the Masticatory System: From Biomechanical to Molecular Interactions. *Front*  
323 *Endocrinol* 2020;11:606947. <https://doi.org/10.3389/fendo.2020.606947>.
- 324 [4] Choi AH, Conway RC, Taraschi V, Ben-Nissan B. Biomechanics and functional distortion of the  
325 human mandible. *J Investig Clin Dent* 2015;6:241–51. <https://doi.org/10.1111/jicd.12112>.
- 326 [5] Wolff JD. *Das Gesetz der Transformation der Knochen*, Berlin: Verlag von Auguste Hirschwald,  
327 1892.
- 328 [6] Frost HM. A 2003 update of bone physiology and Wolff's Law for clinicians. *Angle Orthod*  
329 2004;74:3–15. [https://doi.org/10.1043/0003-3219\(2004\)074<0003:AUOBPA>2.0.CO;2](https://doi.org/10.1043/0003-3219(2004)074<0003:AUOBPA>2.0.CO;2).

- 330 [7] Brotto M, Bonewald L. Bone and muscle: Interactions beyond mechanical. *Bone* 2015;80:109–14.  
331 <https://doi.org/10.1016/j.bone.2015.02.010>.
- 332 [8] Torres-del-Pliego E, Vilaplana L, Güerri-Fernández R, Diez-Pérez A. Measuring bone quality. *Curr*  
333 *Rheumatol Rep* 2013;15:373. <https://doi.org/10.1007/s11926-013-0373-8>.
- 334 [9] Casazza E, Ballester B, Philip-Alliez C, Raskin A. Evaluation of mandibular bone density in  
335 bruxers: the value of panoramic radiographs. *Oral Radiol* 2023;39:117–24.  
336 <https://doi.org/10.1007/s11282-022-00612-3>.
- 337 [10] Kebede B, Megersa S. Idiopathic masseter muscle hypertrophy. *Ethiop J Health Sci* 2011;21:209–  
338 12.
- 339 [11] Antunes JJ, Almeida SA, Monteiro RMP de C, Martins AM. Idiopathic masseter muscle  
340 hypertrophy: a case report. *Einstein* 2019;17.  
341 [https://doi.org/10.31744/einstein\\_journal/2019AI4506](https://doi.org/10.31744/einstein_journal/2019AI4506).
- 342 [12] Manfredini D, Ahlberg J, Aarab G, Bracci A, Durham J, Emodi-Perlman A, et al. The development  
343 of the Standardised Tool for the Assessment of Bruxism (STAB): An international road map. *J Oral*  
344 *Rehabil* 2022. <https://doi.org/10.1111/joor.13380>.
- 345 [13] Richier A, Weydert N. Bouches-du-Rhône, Marseille, prolongement de la ligne 2 du métro de  
346 Bougainville vers Capitaine Gèze - 72 avenue Félix Zoccola. Ancien cimetière des Crottes. Rapport  
347 final d’opération préventive. Inrap Méditerranée, SRA PACA. Nîmes: 2016.
- 348 [14] Perrin M. État sanitaire entre Ancien Régime et révolution industrielle: Étude paléoépidémiologique  
349 de deux populations provençales. *BAR International Series*. Oxford: 2021.
- 350 [15] Bruzek J. A method for visual determination of sex, using the human hip bone. *American Journal*  
351 *of Physical Anthropology*. 2002,117:157-168.
- 352 [16] Murail P, Brůžek J, Houët F, Cunha E. DSP: A tool for probabilistic sex diagnosis using worldwide  
353 variability in hip-bone measurements. *Bull Mém Société D’Anthropologie Paris BMSAP*  
354 2005;17:167–76. <https://doi.org/10.4000/bmsap.1157>.
- 355 [17] Richier A. Bouches-du-Rhône, La Ciotat. Carré Saint-Jacques: L’îlot Saint-Jacques, du vignoble  
356 champêtre au cimetière paroissial. Rapport final d’opération préventive. Inrap Méditerranée, SRA  
357 PACA. Nîmes: 2011.

- 358 [18]Langley NR, Jantz LM, Ousley SD, Jantz RL, Milner G. Data collection procedures for forensic  
359 skeletal material 2.0. Knoxville, TN: Forensic Anthropology Center, Department of Anthropology,  
360 University of Tennessee; 2016. p. 107.
- 361 [19]Buikstra J, Ubelaker D. Standards for Data Collection From Human Skeletal Remains. Arkansas  
362 Archeological Survey Research Series. Fayette-Ville: 1994.
- 363 [20]Türp JC, Simonek M, Dagassan D. Bone apposition at the mandibular angles as a radiological sign  
364 of bruxism: a retrospective study. BMC Oral Health 2021;21:537. [https://doi.org/10.1186/s12903-](https://doi.org/10.1186/s12903-021-01804-9)  
365 [021-01804-9](https://doi.org/10.1186/s12903-021-01804-9).
- 366 [21]Casazza E, Ballester B, Siaud B, Philip-Alliez C, Raskin A. Relationship between bruxism and  
367 mandibular bone modifications based on medical imaging: a scoping review. BMC Oral Health  
368 2023;23:483. <https://doi.org/10.1186/s12903-023-03209-2>.
- 369 [22]Isman O. Evaluation of jaw bone density and morphology in bruxers using panoramic radiography.  
370 J Dent Sci 2021;16:676–81. <https://doi.org/10.1016/j.jds.2020.09.008>.
- 371 [23]Cortes ARG, Jin Z, Morrison MD, Arita ES, Song J, Tamimi F. Mandibular Tori Are Associated  
372 With Mechanical Stress and Mandibular Shape. J Oral Maxillofac Surg 2014;72:2115–25.  
373 <https://doi.org/10.1016/j.joms.2014.05.024>.
- 374 [24]Eninanç İ, Yalçın Yeler D, Çınar Z. Investigation of mandibular fractal dimension on digital  
375 panoramic radiographs in bruxist individuals. Oral Surg Oral Med Oral Pathol Oral Radiol  
376 2021;131:600–9. <https://doi.org/10.1016/j.oooo.2021.01.017>.
- 377 [25]Padmaja Satheeswarakumar L, Elenjickal TJ, Ram SKM, Thangasamy K. Assessment of  
378 Mandibular Surface Area Changes in Bruxers Versus Controls on Panoramic Radiographic Images:  
379 A Case Control Study. Open Dent J 2018;12:753–61.  
380 <https://doi.org/10.2174/1745017901814010753>.
- 381 [26]Gulec M, Tassoker M, Ozcan S, Orhan K. Evaluation of the mandibular trabecular bone in patients  
382 with bruxism using fractal analysis. Oral Radiol 2020. [https://doi.org/10.1007/s11282-020-00422-](https://doi.org/10.1007/s11282-020-00422-5)  
383 [5](https://doi.org/10.1007/s11282-020-00422-5).



- 384 [27]Serafim I, Rode S, Lopes S, Oliveira W, Pinho S, Silva E, et al. Impact of bruxism on  
385 craniomandibular morphology: A cone-beam computed tomographic study. *Cranio J Craniomandib*  
386 *Pract* 2022;1–11. <https://doi.org/10.1080/08869634.2022.2139334>.
- 387 [28]Sheppard SM. Asymptomatic morphologic variations in the mandibular condyle-ramus region. *J*  
388 *Prosthet Dent* 1982;47:539–44. [https://doi.org/10.1016/0022-3913\(82\)90306-7](https://doi.org/10.1016/0022-3913(82)90306-7).
- 389 [29]Cioffi I, van Ruijven LJ, Renders G a. P, Farella M, Michelotti A, van Eijden TMGJ. Regional  
390 variations in mineralization and strain distributions in the cortex of the human mandibular condyle.  
391 *Bone* 2007;41:1051–8. <https://doi.org/10.1016/j.bone.2007.08.033>.
- 392 [30]Cezairli B, Torul D, Kahveci K. The association between bruxism and mandibular morphology: A  
393 cross-sectional study. *J Oral Health Oral Epidemiol* 2022;11:19–24.  
394 <https://doi.org/10.22122/johoe.2022.195434.1234>.
- 395 [31]van Eijden TM. Biomechanics of the mandible. *Crit Rev Oral Biol Med Off Publ Am Assoc Oral*  
396 *Biol* 2000;11:123–36. <https://doi.org/10.1177/10454411000110010101>.
- 397

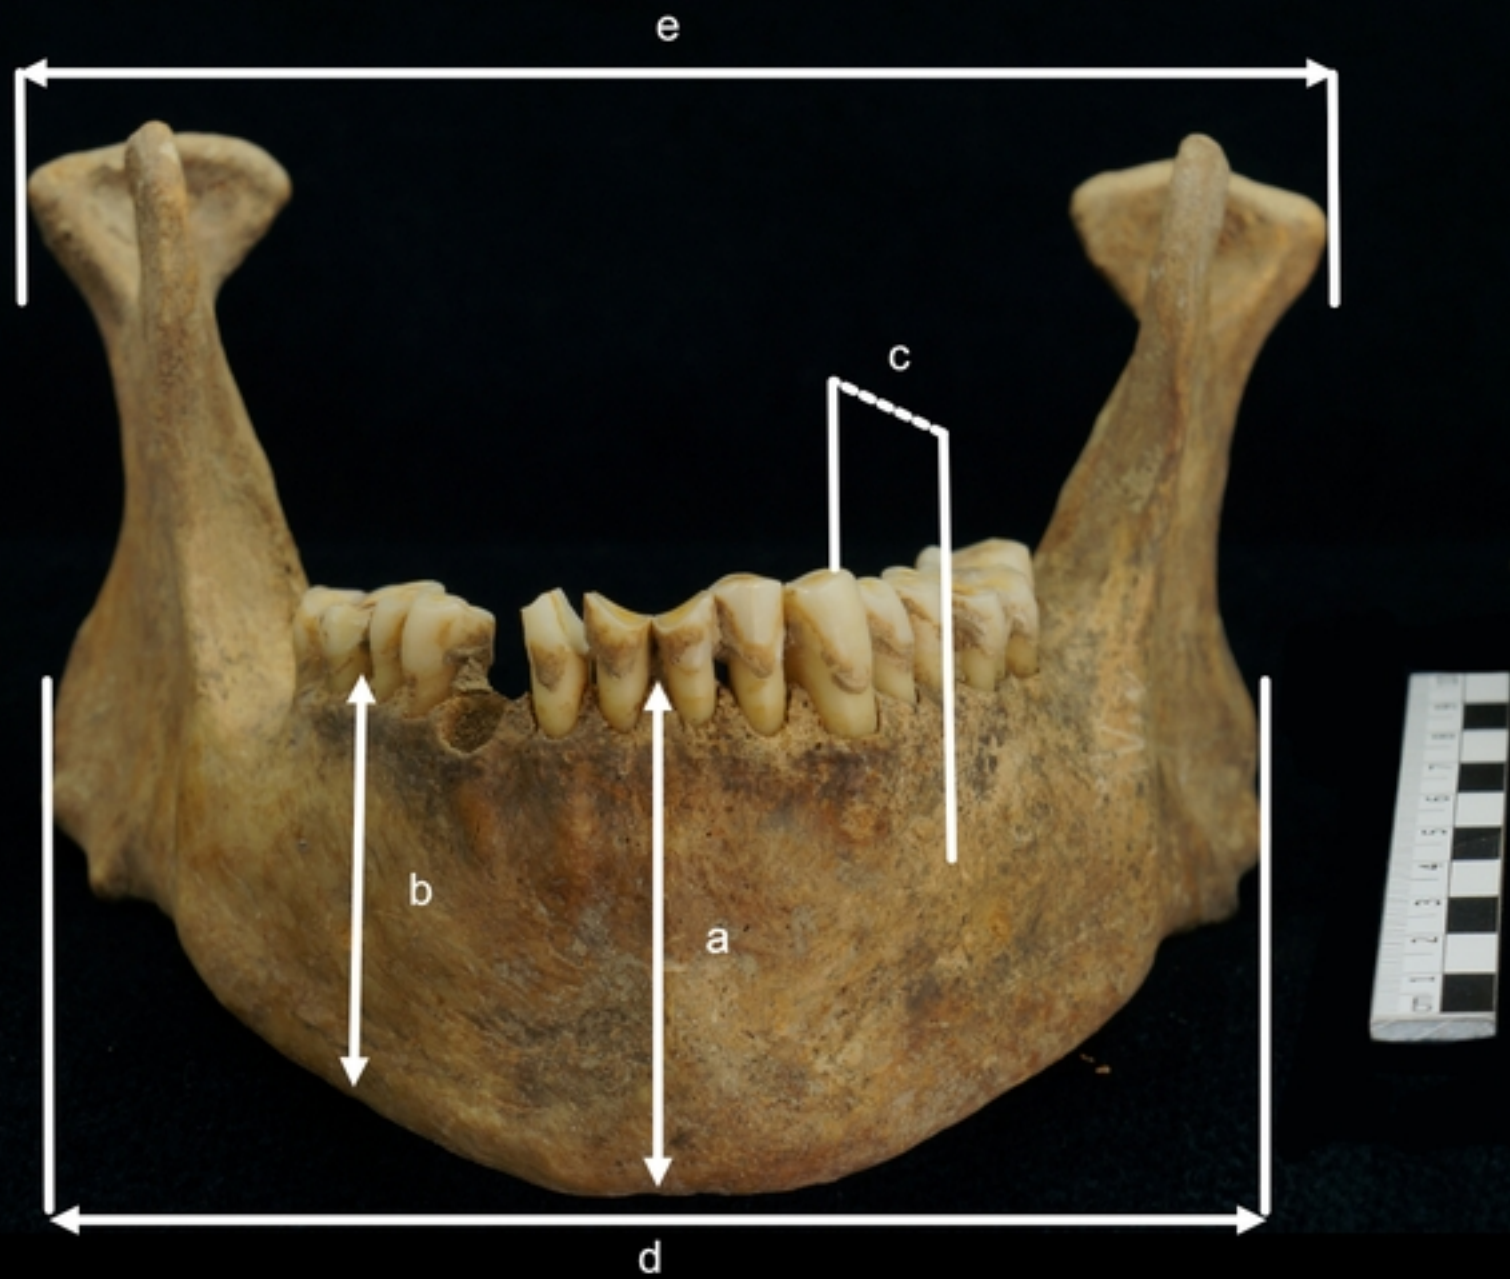

Fig 1a

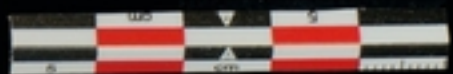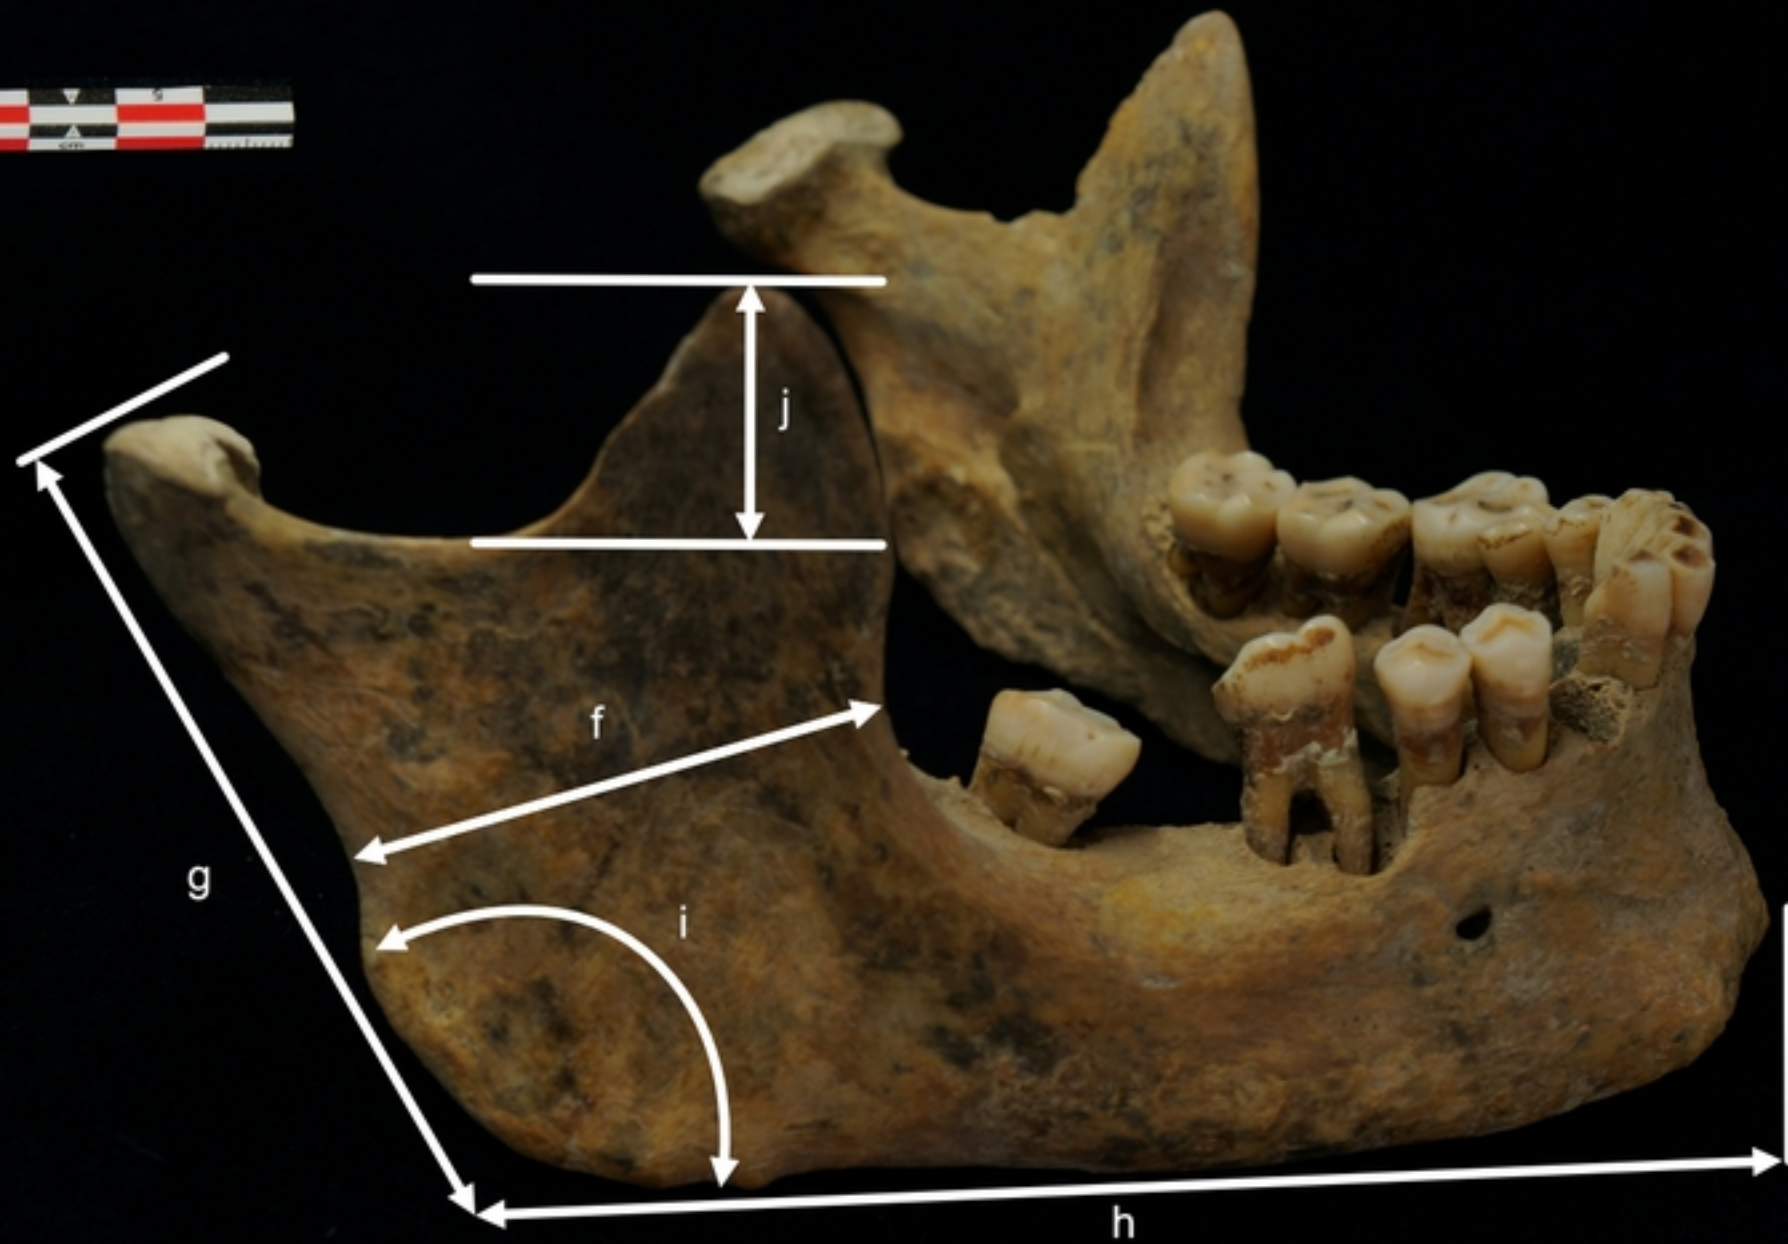

Fig 1b

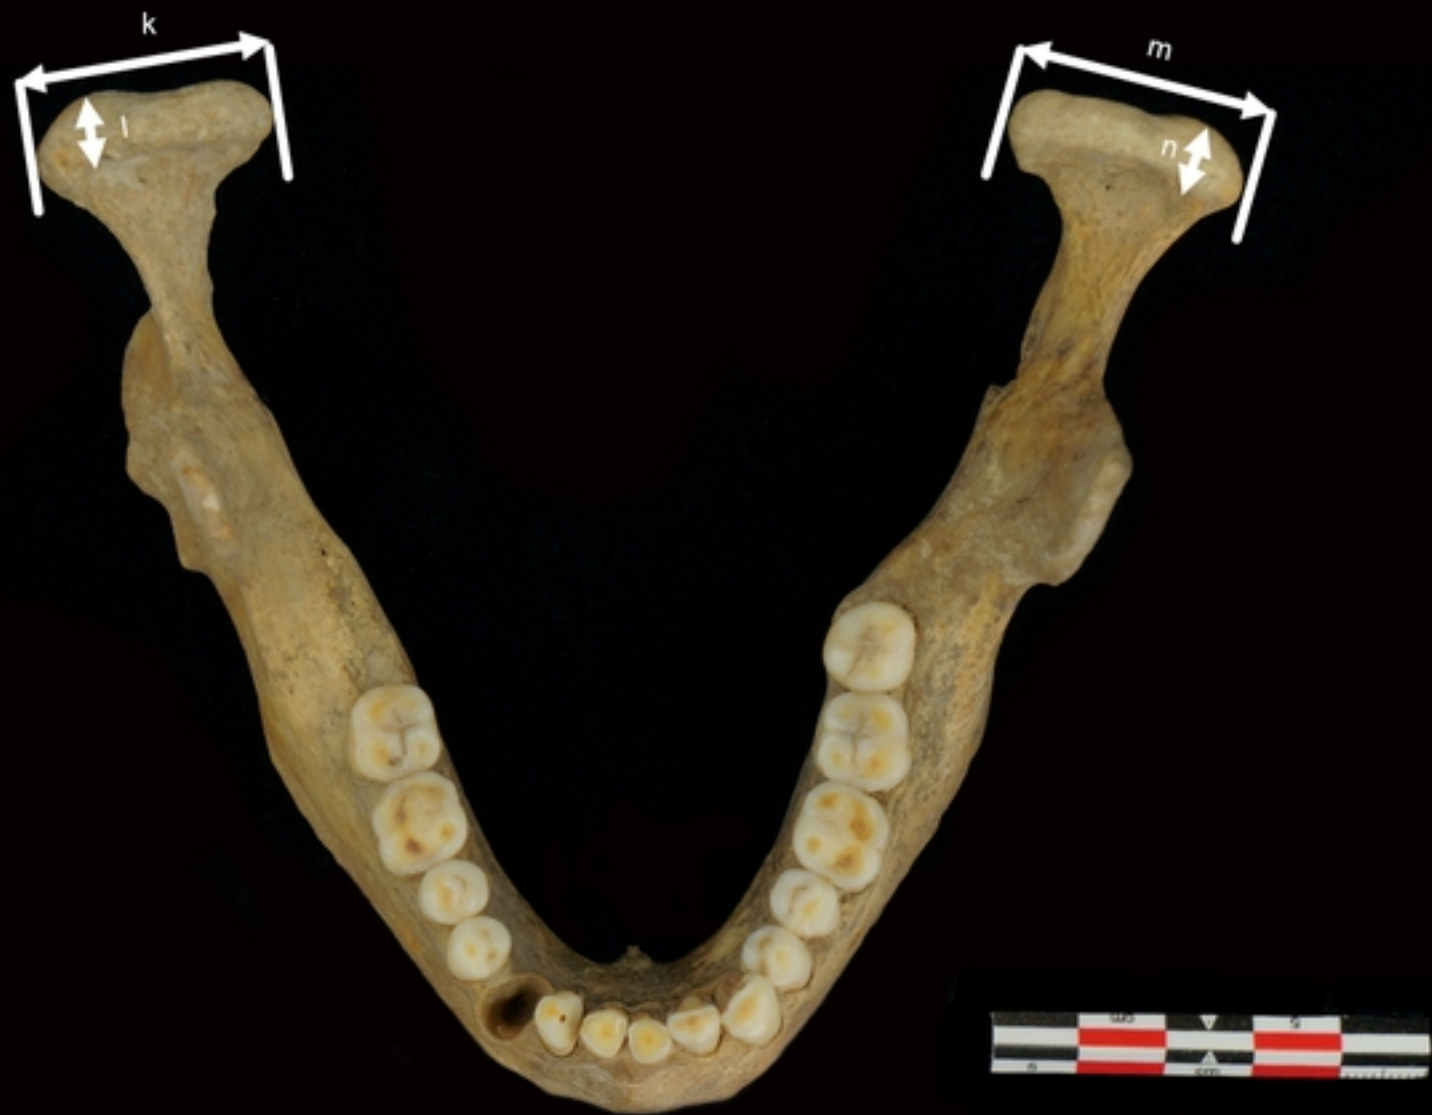

Fig 1c



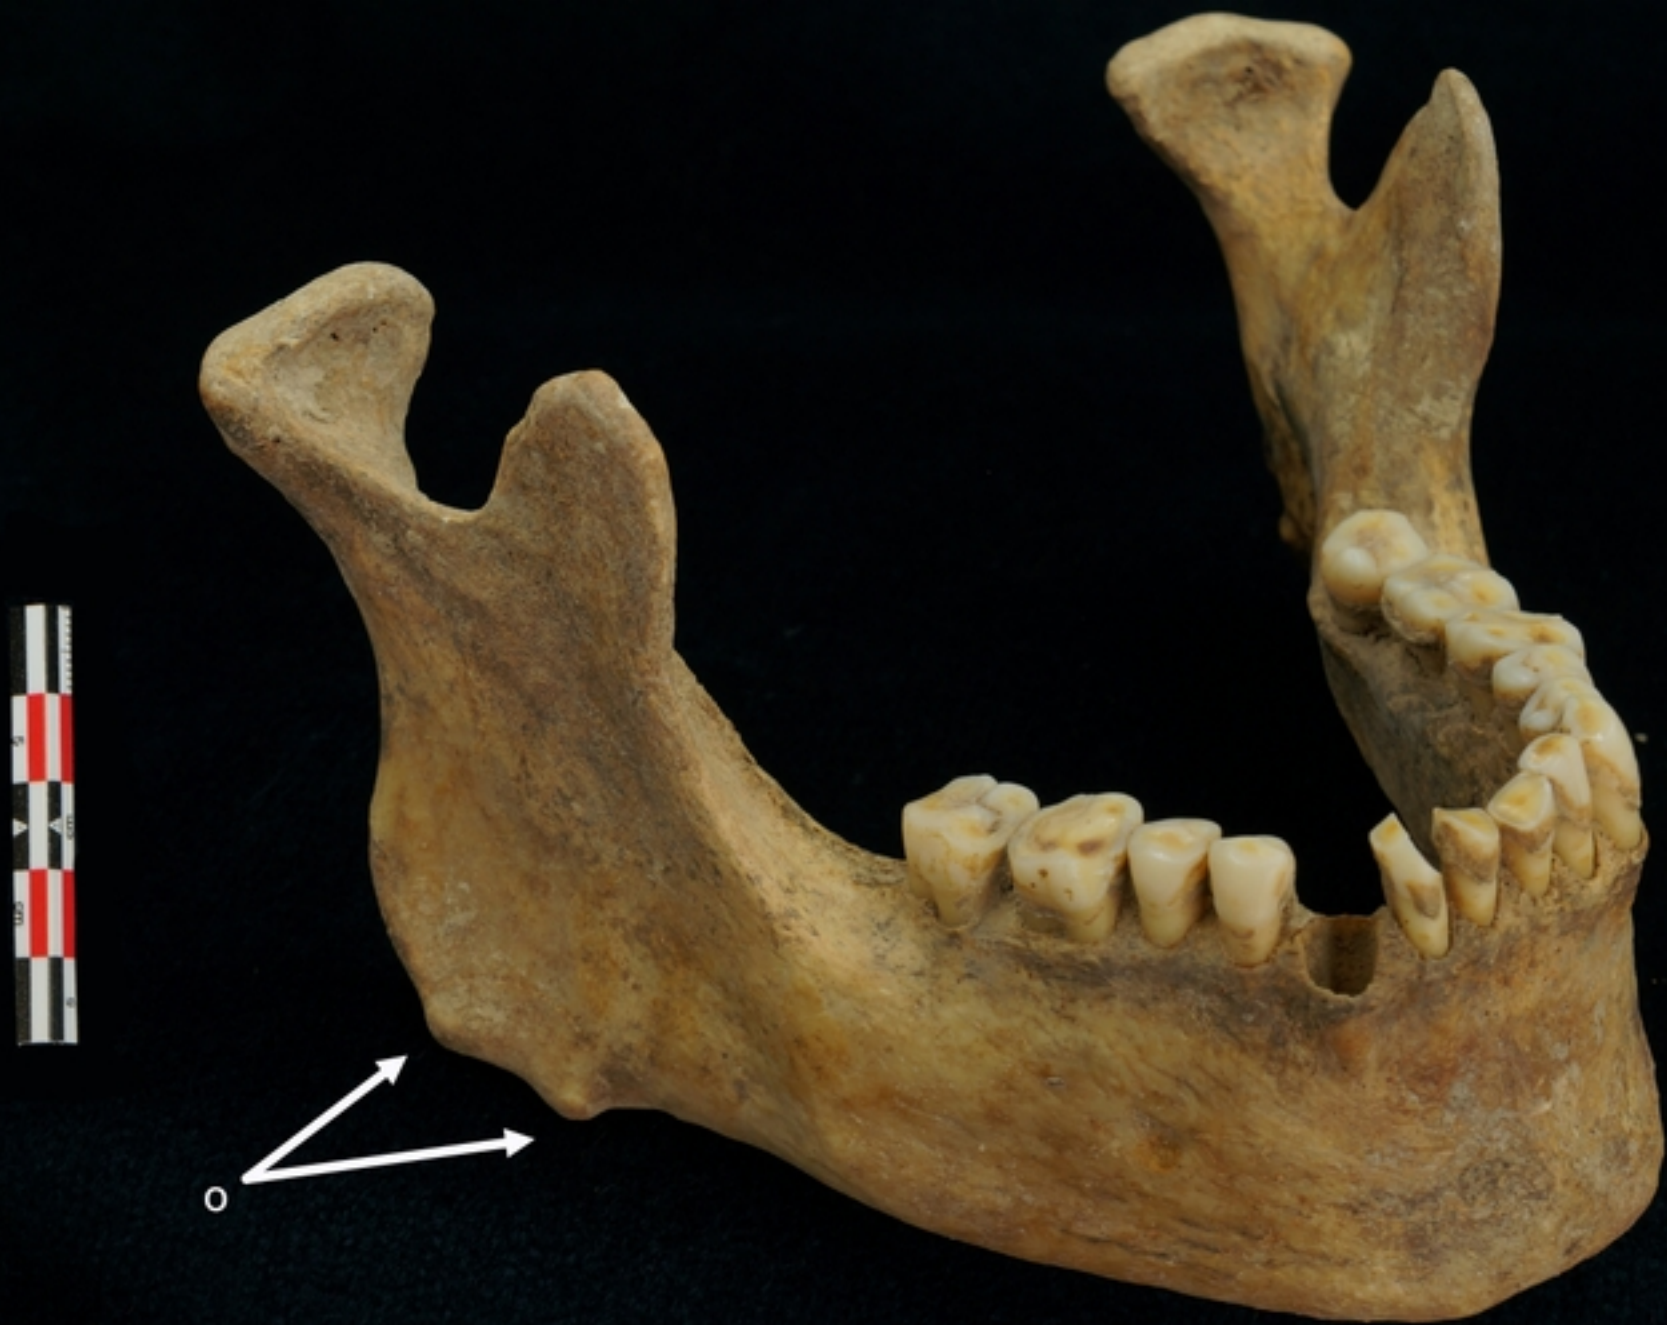

Fig 1d

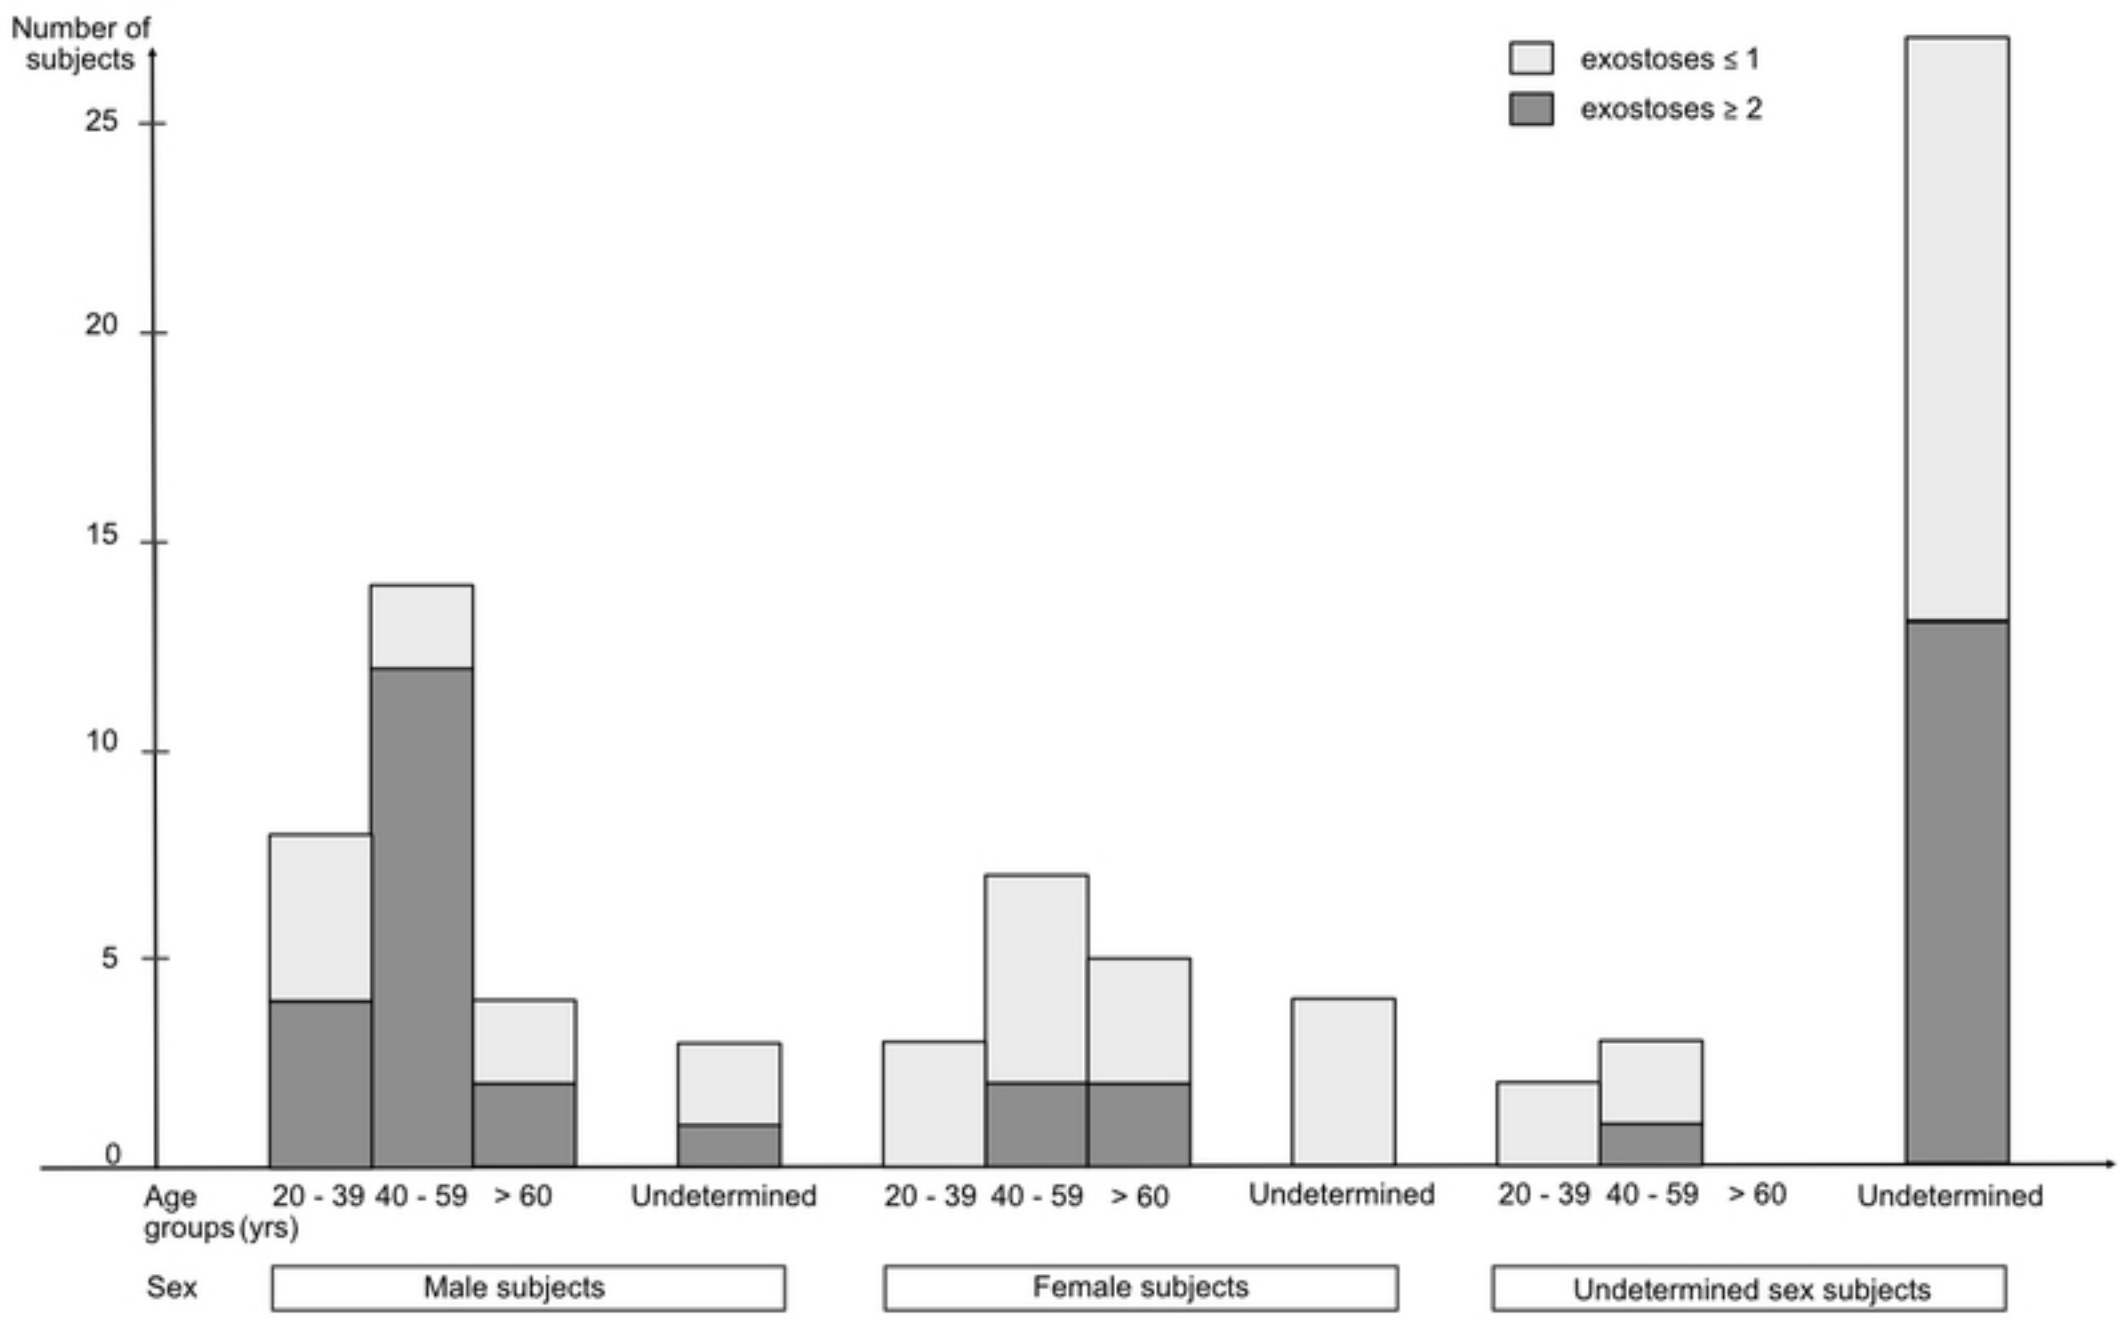

Fig 2

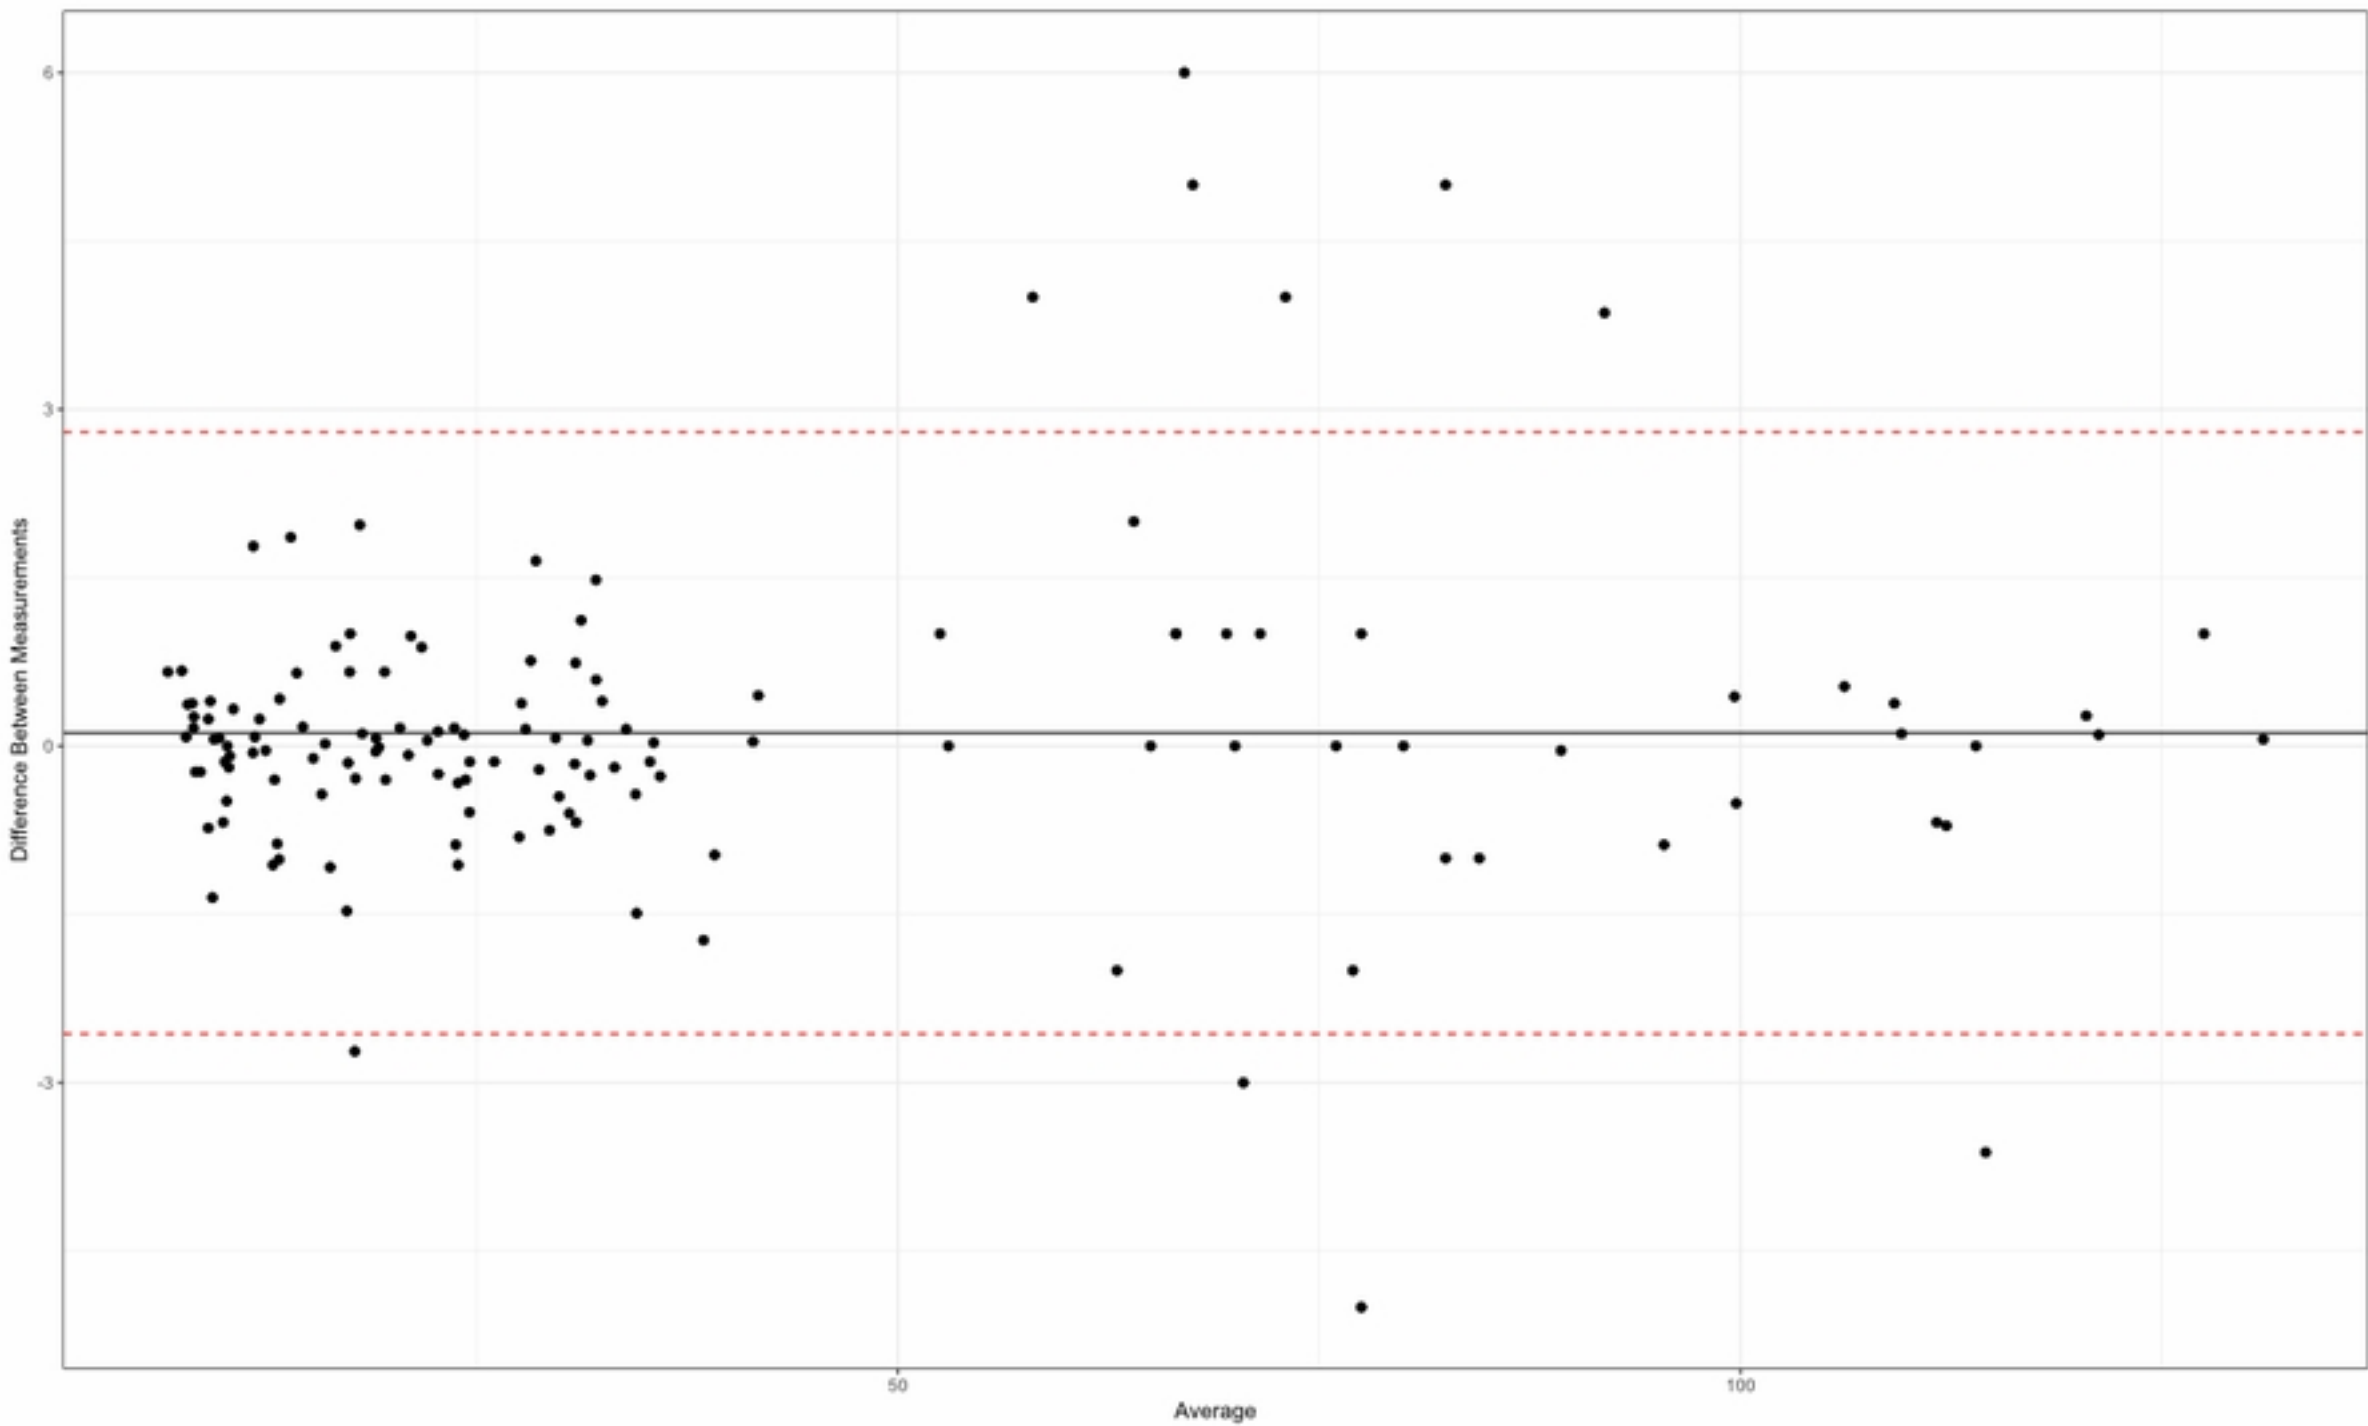

Fig 3

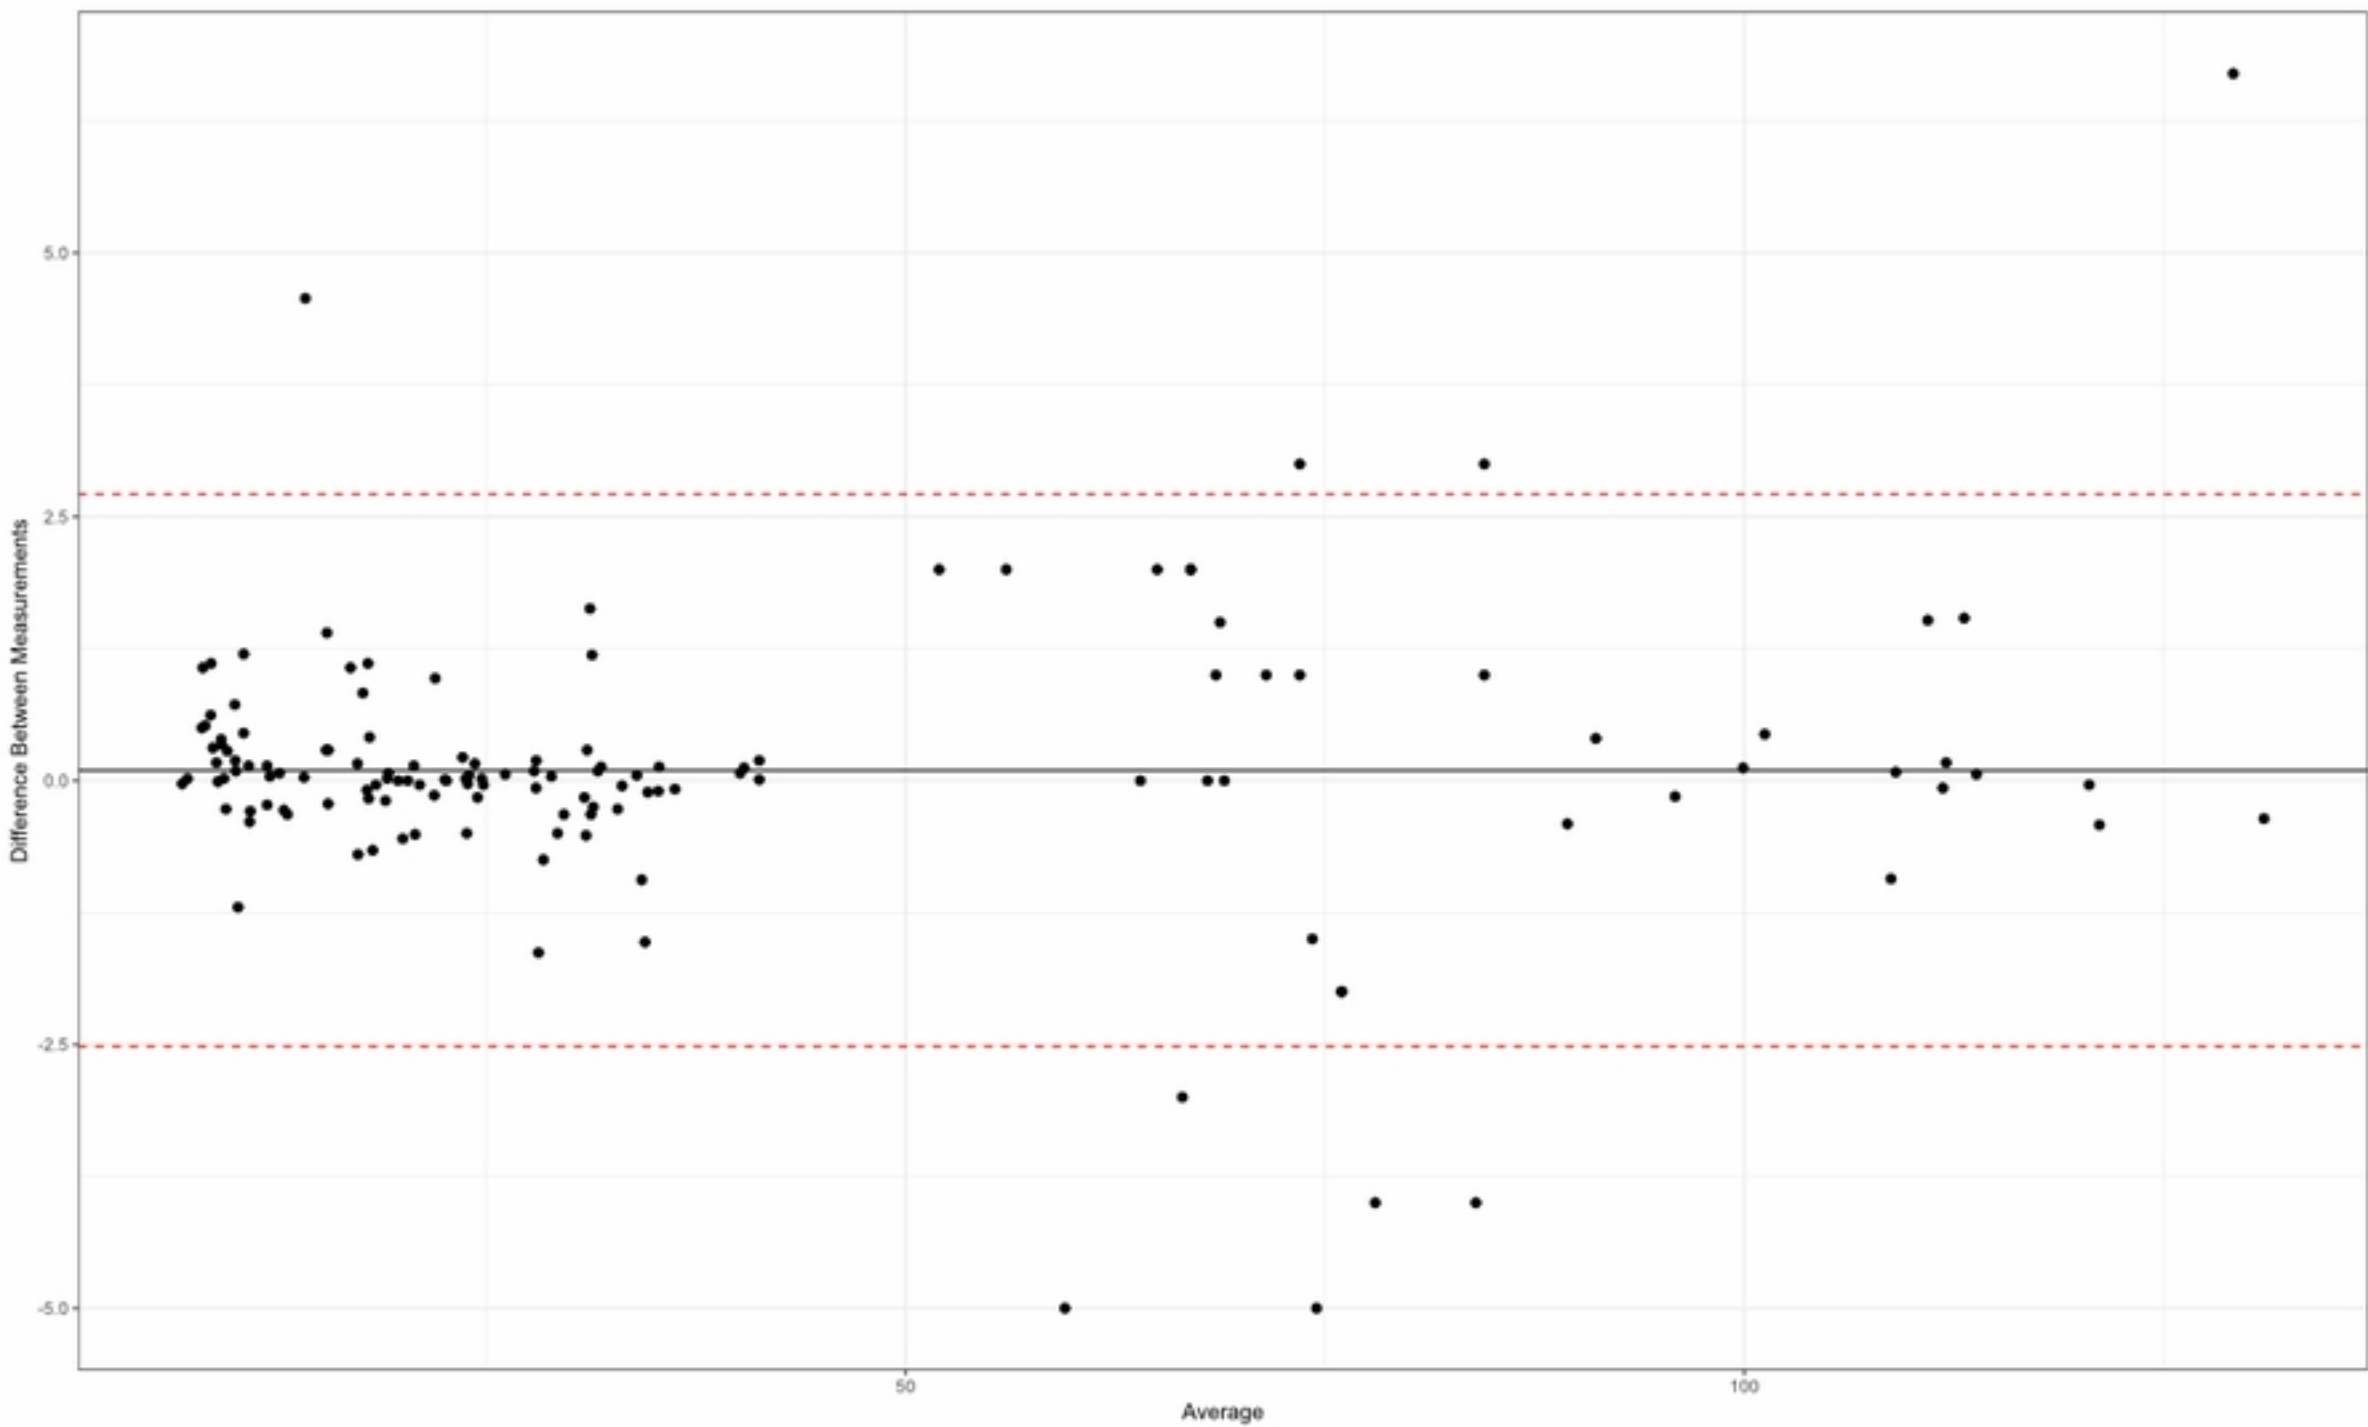

Fig 4



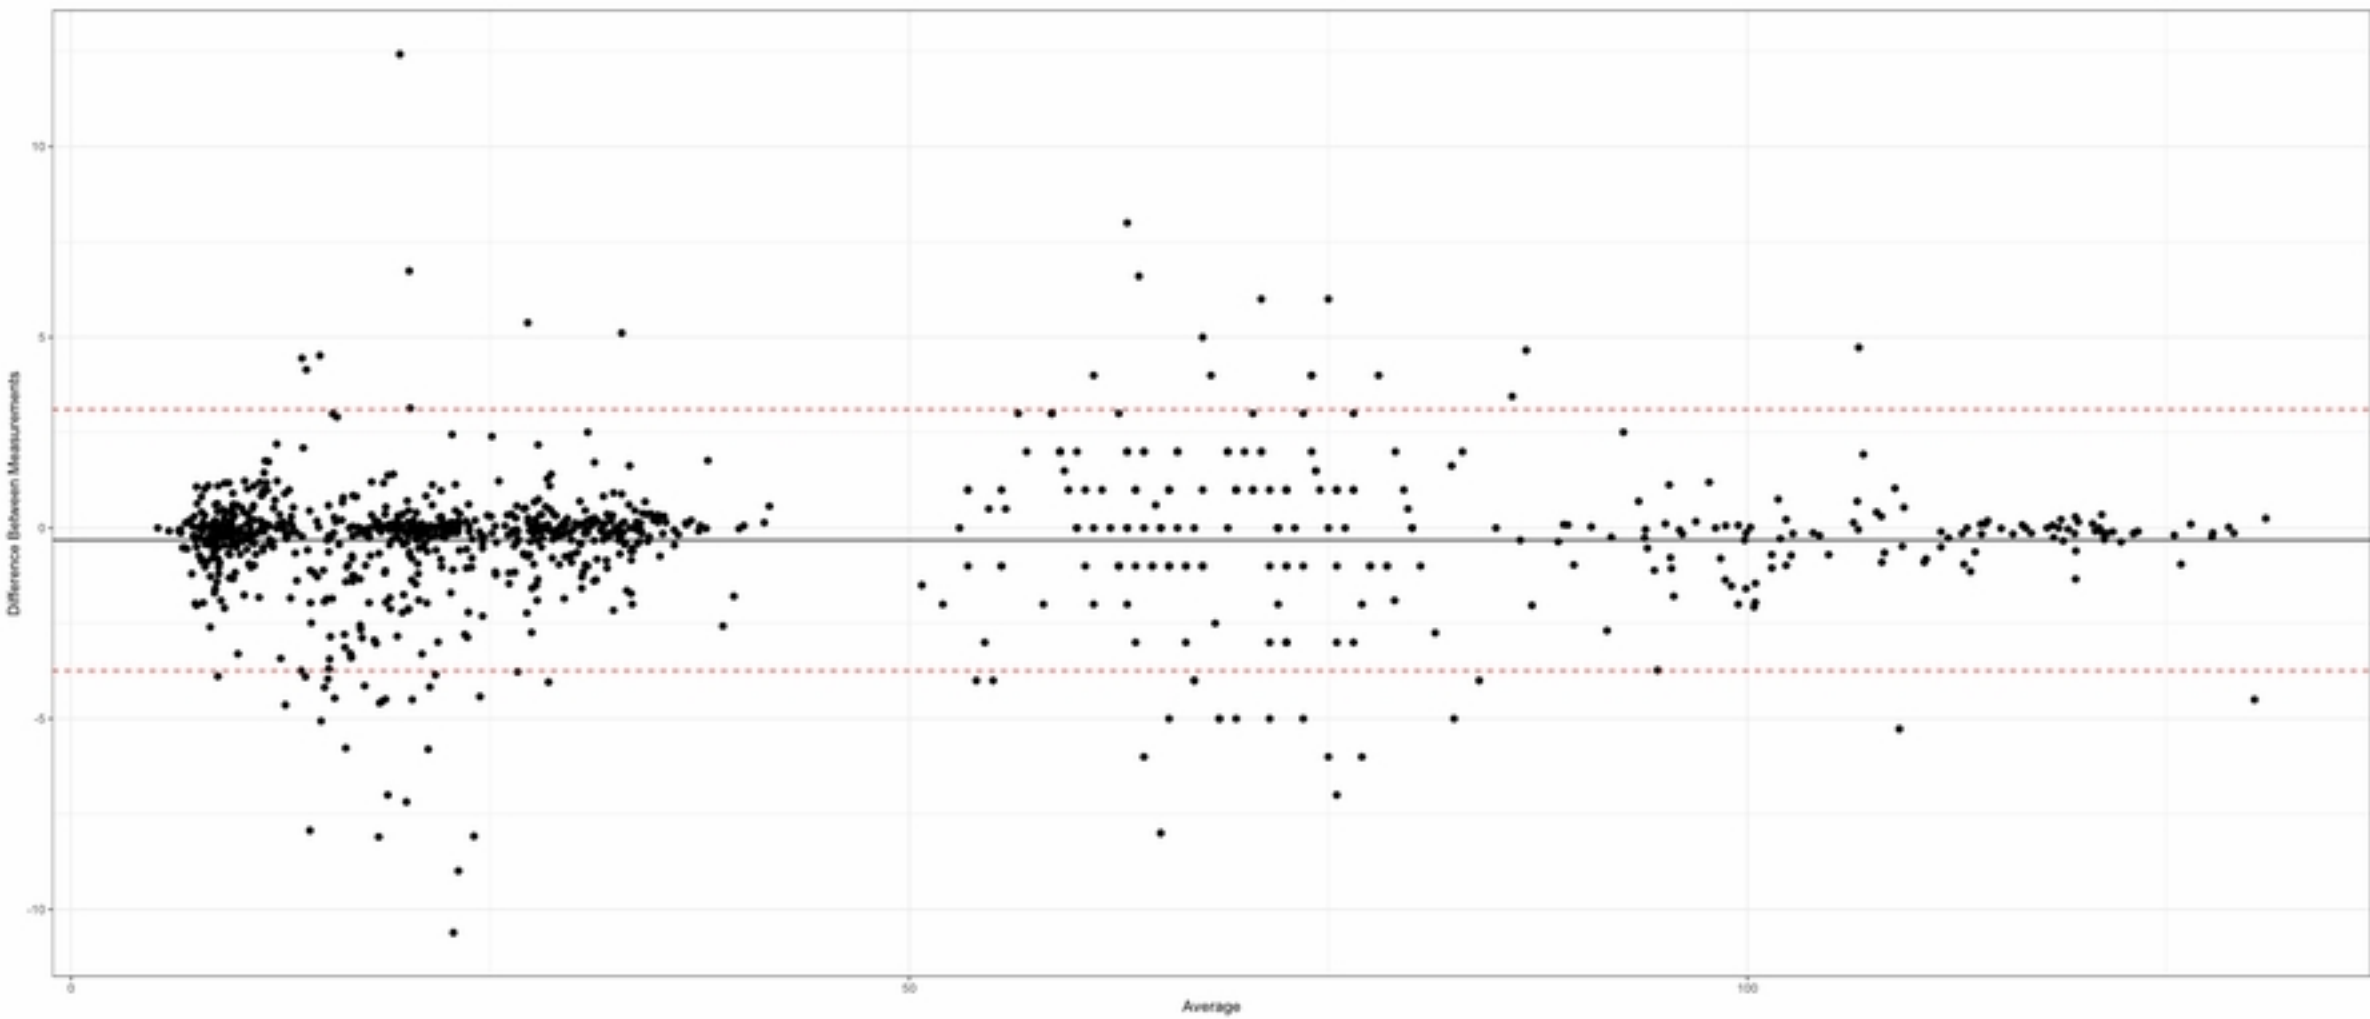

Fig 5
